# Supplementary material
Source: ML conference proceedings conference paper supplement (https://proceedings.mlr.press/v164/paxton22a.html)
Supplement: Supplementary file 1 [file paxton22a-supp.zip]

Archive with 2 entries (2 files):
- Placement_Planning_Networks_full_paper.pdf
- placement_planning_networks_appendix.pdf
